# Supplementary material
Source: PubMed Central journal article supplement (PMC5501711)
Supplement: NIHMS858818-supplement-Appendix_1.pdf [file NIHMS858818-supplement-Appendix_1.pdf]

## CHOICES/OPCIONES Baseline Survey

Please enter the following before administering the baseline:

Participant Gender:  Male  Female

Completed Forms:  Consent  
 HIPAA

***Thank you for agreeing to participate in the CHOICES/OPCIONES Study. Please answer the following questions. There are no right or wrong answers. You can skip any questions you don't want to answer.***

1. What is your language preference?  
 English  
 Spanish
2. In general, would you say your health is:  
 Excellent  
 Very Good  
 Good  
 Fair  
 Poor
3. Do you have a personal primary care provider who regularly cares for you?  
 Yes  
 No  
 Don't Know/Not Sure

***Next I am going to ask about three areas of health and wellness: exercise, food safety, and one type of cancer screening. Do your best to answer and don't worry if you don't know the answers or aren't sure.***

4. How much time per day should you spend exercising?  
 15 minutes  
 30 minutes  
 45 minutes  
 60 minutes  
 Don't know/Not sure
5. It's ok to cut up raw chicken and then cut raw vegetables on the same cutting board as long as you wipe the board off with a clean cloth between the different foods.  
 True  
 False  
 Don't Know/Not Sure
6. To be safe to eat, a hamburger should be cooked until it is no longer pink inside.  
 True  
 False  
 Don't Know/Not Sure
7. It is possible to do a colon cancer screening test at home. Is this true or false, or are you not sure?  
 True  
 False  
 Don't Know/Not Sure

8. A person can drive his or her car immediately after a colonoscopy. Is this true or false, or are you not sure?
- True
  - False
  - Don't Know/Not Sure
9. There is no risk during the colonoscopy procedure. Is this true or false, or are you not sure?
- True
  - False
  - Don't Know/Not Sure
10. The (stool) fecal occult blood test, or FOBT, should be done every three years. Is this true or false, or are you not sure?
- True
  - False
  - Don't Know/Not Sure
11. There is only one way to get screened for colon cancer. Is this true or false, or are you not sure?
- True
  - False
  - Don't Know/Not Sure
12. At what age is it recommended that a person start getting screened for colon cancer?
- 35
  - 40
  - 45
  - 50
  - 55
  - Don't Know/Not Sure
13. How much do you agree or disagree with this statement? "I plan to be screened for colon cancer"
- Strongly disagree
  - Disagree
  - Neither agree nor disagree
  - Agree
  - Strongly agree

***Now I am going to ask you a few questions about yourself.***

14. What race do you consider yourself to be? Choose the one that applies to you most.
- American Indian or Alaskan Native
  - Asian
  - Black or African-American
  - Native Hawaiian or Pacific Islander
  - White
  - Other: \_\_\_\_\_
15. Do you consider yourself to be of Latino or Hispanic origin?
- Yes
  - No (**SKIP TO 22**)

**Latino/Hispanic participants only:**

16. Were you born in the United States?

- Yes
- No

17. What is your country of origin? \_\_\_\_\_

18. In general, what language(s) do you read and speak?

- Only Spanish
- Spanish better than English
- Both Equally
- English better than Spanish
- Only English

19. What language(s) do you usually speak at home?

- Only Spanish
- Spanish more than English
- Both Equally
- English more than Spanish
- Only English

20. What language(s) do you usually speak with your friends?

- Only Spanish
- Spanish more than English
- Both Equally
- English more than Spanish
- Only English

21. In which language(s) do you usually think?

- Only Spanish
- Spanish more than English
- Both Equally
- English more than Spanish
- Only English

**All participants**

22. How often do you need to have someone help you when you read instructions, pamphlets, or other written material from your doctor or pharmacy?

- Never
- Rarely
- Sometimes
- Often
- Always

23. What type of medical insurance do you have? Please check ALL that apply.

- Medicaid
- Medicare
- Veteran's Affairs (VA)
- Private
- None
- Other \_\_\_\_\_

24. How many years of schooling have you finished? \_\_\_\_\_

Conversion:

Elementary School = 6 years

Middle School = 9 years

High School = 13 years

2 year College/Associates Degree/Technical School = 15 years

4 year College/Bachelors Degree = 19 years

More than college = 20 or more years

25. What is your current marital status?

- Married /living with a partner
- Separated
- Divorced
- Widowed
- Single/Never married

26. Are you currently employed?

- Yes/full time
- Yes/part time
- Unemployed
- Retired
- Other: \_\_\_\_\_
- Declined

27. Which of the following categories represents you and your household's annual income?

- Less than \$10,000 per year (Less than \$195 per week)
- \$10,000-\$19,999 per year (\$196-\$385 per week)
- \$20,000-\$29,999 per year (\$386-\$576 per week)
- \$30,000-\$39,999 per year (\$577-\$770 per week)
- \$40,000 or more per year (\$771 or more per week)
- Declined

***Thank you for answering this survey. Next I am going to have you watch a video. I need to open an envelope to find out which video you are going to watch.***

**CHOICES/OPCIONES Post Encounter Survey**

[The participant has just completed the provider visit, including any interaction with nurses, etc. Complete this script and the Post Encounter Survey prior to completing any additional navigation activities. It's best if this is done in the waiting room or somewhere away from the clinical team.]

*Hi \_\_\_\_\_. I see that you just finished seeing your doctor. I need to ask you a few more survey questions, and then I can give you your \$40 gift card. If you have any questions for me, I may be able to answer them after we finish. I am not a medical doctor, so I may not be able to answer your medical questions.*

1. Do you feel that your health care needs were met today?

- Yes
- No
- Don't Know/Not Sure

*Now I am going to ask you about three areas of health and wellness: exercise, food safety, and one type of cancer screening. Do your best to answer and don't worry if you don't know the answers or aren't sure. These questions may sound familiar.*

2. How much time per day should you spend exercising?

- 15 minutes
- 30 minutes
- 45 minutes
- 60 minutes
- Don't Know/Not Sure

3. It's okay to cut up raw chicken and then cut up raw vegetables on the same cutting board as long as you wipe the board off with a clean cloth between the different foods.

- True
- False
- Don't Know/Not Sure

4. To be safe to eat, a hamburger patty should be cooked until it is no longer pink inside.

- True
- False
- Don't Know/Not Sure

5. It is possible to do a colon cancer screening test at home. Is this true or false, or are you not sure?

- True
- False
- Don't Know/Not Sure

6. A person can drive his or her car immediately after a colonoscopy. Is this true or false, or are you not sure?
- True
  - False
  - Don't Know/Not Sure
7. There is no risk during the colonoscopy process. Is this true or false, or are you not sure?
- True
  - False
  - Don't Know/Not Sure
8. The (stool) fecal occult blood test, or FOBT, should be done every three years. Is this true or false, or are you not sure?
- True
  - False
  - Don't Know/Not Sure
9. There is only one way to get screened for colon cancer. Is this true or false, or are you not sure?
- True
  - False
  - Don't Know/Not Sure
10. At what age is it recommended that a person start getting screened for colon cancer?
- 35
  - 40
  - 45
  - 50
  - 55
  - Don't Know/Not Sure

***We are almost done. The next questions I am going to ask are about what you may have discussed with your medical team today, and what you plan to do.***

11. Did you discuss exercise with your doctor today?
- Yes
  - No
  - Don't Know/Not Sure
12. Did you discuss food safety with your doctor today?
- Yes
  - No
  - Don't Know/Not Sure
13. Did you discuss colon cancer screening tests (such as colonoscopy or FOBT) with your doctor today? **IF ANSWER IS NO, SKIP TO QUESTION 15**
- Yes
  - No
  - Don't Know/Not Sure

14. Which colon cancer screening test did you discuss with your doctor today?
- FOBT only
  - Colonoscopy only
  - FOBT and Colonoscopy
  - Don't Know/Not Sure
15. How much do you agree or disagree with this statement? "I plan to learn more about food safety".
- Strongly disagree
  - Disagree
  - Neither agree nor disagree
  - Agree
  - Strongly agree
16. How much do you agree or disagree with this statement? "I plan to exercise for at least 30 minutes per day".
- Strongly disagree
  - Disagree
  - Neither agree nor disagree
  - Agree
  - Strongly agree
17. How much do you agree or disagree with this statement? "I plan to be screened for colon cancer".
- Strongly disagree
  - Disagree
  - Neither agree nor disagree
  - Agree
  - Strongly agree
18. If you had to choose a colon cancer screening test, which test would you prefer?
- I would prefer to do an FOBT
  - I would prefer to get a colonoscopy
  - I haven't decided which test
  - I don't have enough information to decide
19. How confident are you that you could do what is necessary to complete an FOBT?
- Not at all confident
  - A little confident
  - Somewhat confident
  - Confident
  - Extremely confident
  - I don't have enough information to know
20. How confident are you that you could do what is necessary to complete a colonoscopy?
- Not at all confident
  - A little confident
  - Somewhat confident
  - Confident
  - Extremely confident
  - I don't have enough information to know

***I have just three more questions about your visit today. Did any of the following happen TODAY with your medical team?***

21. Did you get an FOBT kit (home stool test for blood)?
- Yes, who? \_\_\_\_\_
  - No
  - Don't Know/Not Sure
22. Did your doctor refer you for a colonoscopy?
- Yes
  - No
  - Don't Know/Not Sure
23. Did your doctor refer you for another colon cancer screening test?
- Yes
  - No
  - Don't Know/Not Sure



**CHOICES/OPCIONES Baseline Survey**

Please enter the following before administering the baseline:

Participant Gender:  Male  Female

Completed Forms:  Consent  
 HIPAA

***Gracias por participar en el estudio CHOICES/OPCIONES. Por favor conteste las siguientes preguntas. No hay respuestas correctas o incorrectas. Puede decidir no contestar cualquier pregunta que no quiere dar respuesta.***

1. ¿Cuál es su idioma preferido?  
 Inglés  
 Español
2. ¿En general, diría Usted que el estado de su salud es:  
 Excelente  
 Muy bueno  
 Bueno  
 Regular  
 Malo
3. ¿Tiene un proveedor de atención primaria que cuida de Usted regularmente?  
 Sí  
 No  
 No sé/No estoy seguro/a

***Ahora, voy a preguntarle sobre tres áreas de salud y bienestar: ejercicio, sanidad de los alimentos y un tipo de detección de cáncer. No se preocupa si no sabe las respuestas o si no está seguro/a***

4. ¿Por cuánto tiempo debe Usted hacer ejercicio por día?  
 15 minutos  
 30 minutos  
 45 minutos  
 60 minutos  
 No sé/No estoy seguro/a
5. Está bien cortar pollo crudo y cortar vegetales usando la misma tabla mientras tanto que se limpie con un trapo limpio entre los diferentes alimentos. (¿Es esto cierto, falso, o no está seguro/a?)  
 Cierto  
 Falso  
 No sé/No estoy seguro/a

6. Para ser saludable, una hamburguesa tiene que estar cocinada hasta que por dentro no se vea ningún color rosado. (¿Es esto cierto, falso, o no está seguro/a?)
- Cierto
  - Falso
  - No sé/No estoy seguro/a
7. Es posible hacerse una prueba para la detección de cáncer de colon en la casa. (¿Es esto cierto, falso, o no está seguro/a?)
- Cierto
  - Falso
  - No sé /No estoy seguro/a
8. Una persona puede manejar su carro inmediatamente después de una colonoscopia. (¿Es esto cierto, falso, o no está seguro/a?)
- Cierto
  - Falso
  - No sé /No estoy seguro/a
9. No hay ningún riesgo durante el procedimiento de la colonoscopia. (¿Es esto cierto, falso, o no está seguro/a?)
- Cierto
  - Falso
  - No sé /No estoy seguro/a
10. Una persona debe hacerse una prueba de la materia fecal, o FOBT, cada 3 años. (¿Es esto cierto, falso, o no está seguro/a?)
- Cierto
  - Falso
  - No sé /No estoy seguro/a
11. Solamente hay una prueba para la detección temprana de cáncer de colon. (¿Es esto cierto, falso, o no está seguro/a?)
- Cierto
  - Falso
  - No sé /No estoy seguro/a
12. ¿En qué edad se recomienda que una persona debe comenzar a hacerse una prueba de detección de cáncer de colon?
- 35
  - 40
  - 45
  - 50
  - 55
  - No sé/No estoy seguro/a

13. Por favor, dígame que tanto Usted está de acuerdo o en desacuerdo con esta declaración: “Tengo la intención de hacerme una prueba de detección de cáncer de colon”.

- Muy en desacuerdo
- En desacuerdo
- No en acuerdo o en desacuerdo
- De acuerdo
- Muy de acuerdo

***Ahora voy a preguntarle sobre si mismo.***

14. ¿Qué raza se considera Usted? Elija una o más de las siguientes

- Indio Americano o nativo de Alaska
- Asiático
- Negro o Afro-Americano
- Nativo de Hawái o otra Isla Pacifica
- Blanco
- Otra \_\_\_\_\_

15. ¿Se considera Usted de origen Latino/Hispano?

- Sí
- No (SKIP TO 22)

***Solo contesta las preguntas 16-22 si Usted se considera Latino o Hispano. Sino pase a la pregunta número 22.***

16. ¿Nació Usted en los Estados Unidos?

- Sí
- No

17. Si no, ¿cuál es su país de nacimiento? \_\_\_\_\_

18. ¿En general, en que idioma lee y habla Usted?

- Solo español
- Español mejor que ingles
- Ambos iguales
- Ingles mejor que español
- Solo ingles

19. ¿Cuál idioma habla Usted en su casa?

- Solo español
- Español más que ingles
- Ambos iguales
- Ingles más que español
- Solo ingles

20. ¿Cuál idioma habla Usted con sus amigos?

- Solo español
- Español más que ingles
- Ambos iguales
- Ingles más que español
- Solo ingles

21. ¿En general, en cuál idioma piensa Usted?

- Solo español
- Español más que ingles
- Ambos iguales
- Ingles más que español
- Solo ingles

All participants

22. ¿Con que frecuencia tiene Usted alguien que le ayude a leer instrucciones, folletos o otro material escrito de su médico o farmacia?

- Nunca
- Raramente
- A veces
- A menudo
- Siempre

23. ¿Qué tipo de seguro médico tiene Usted? (*Indica todos lo que aplican*):

- Medicaid
- Medicare
- Asuntos de los Veteranos (VA)
- Privado
- Ninguno
- Otro \_\_\_\_\_

24. ¿Cuántos años de escuela ha terminado Usted? \_\_\_\_\_

*Conversion:*

*Elementary School = 6 years*

*Middle School = 9 years*

*High School = 13 years*

*2 year College/Associates Degree/Technical School = 15 years*

*4 year College/Bachelors Degree = 19 years*

*More than college = 20 or more years*

25. ¿Cuál es su estado civil actual?

- Casado/a o Viviendo con pareja
- Separado/a
- Divorciado/a
- Viudo/a
- Solo/a o Nunca casado/a

26. ¿Está Usted actualmente empleado/a?

- Si/ tiempo completo
- Si/ tiempo parcial
- Desempleado/a
- Jubilado/a
- Otro: \_\_\_\_\_
- Declinó

27. ¿Cuál de las siguientes categorías describe mejor los ingresos totales de su hogar al año?

- Menos de \$10,000 al año (menos de \$195 por semana)
- \$10,000 a \$19,999 al año (\$196-\$385 por semana)
- \$20,000 a \$29,999 al año (\$386-\$576 por semana)
- \$30,000 a \$39,999 al año (\$577-\$770 por semana)
- \$40,000 al año o más (\$771 o más por semana)
- Declinó

***Gracias por contestar este encuesta. Ahora, necesitó abrir este sobre para saber que video educativo Usted va a ver.***

## CHOICES/OPCIONES Post Encounter Survey

[The participant has just completed the provider visit, including any interaction with nurses, etc. Complete this script and the Post Encounter Survey prior to completing any additional navigation activities. It's best if this is done in the waiting room or somewhere away from the clinical team.]

*Hola \_\_\_\_\_. Bueno, acaba de terminar la visita con su médico. Tengo algunas preguntas más en otra encuesta y después recibirá la tarjeta de regalo de \$40. Si tiene Usted preguntas, puedo contestarlas después de que terminamos esta encuesta. Recuerda que no soy un médico y no puedo contestar sus preguntas médicas.*

1. ¿Siente Usted que se han cumplido sus necesidades medicas hoy?

- Si
- No
- No sé/No estoy seguro

*Ahora, voy a preguntarle sobre tres áreas de salud y bienestar: ejercicio, la sanidad de los alimentos, y un tipo de detección de cáncer. No se preocupe si no sabe las respuestas o si no está seguro/a. Algunas preguntas pueden sonar familiares.*

2. ¿Por cuánto tiempo debe Usted hacer ejercicio por día?

- 15 minutos
- 30 minutos
- 45 minutos
- 60 minutos
- No sé/No estoy seguro/a

3. Está bien cortar pollo crudo y cortar vegetales usando la misma tabla mientras tanto que se limpie con un trapo limpio entre los diferentes alimentos. (¿Es esto cierto, falso, o no está seguro/a?)

- Cierto
- Falso
- No sé/No estoy seguro/a

4. Para ser saludable, una hamburguesa tiene que estar cocinada hasta que por dentro no se vea ningún color rosado. (¿Es esto cierto, falso, o no está seguro/a?)

- Cierto
- Falso
- No sé/No estoy seguro/a

5. Es posible hacerse una prueba para la detección de cáncer de colon en la casa. (¿Es esto cierto, falso, o no está seguro/a?)

- Cierto
- Falso
- No sé /No estoy seguro/a

6. Una persona puede manejar su carro inmediatamente después de una colonoscopia. (¿Es esto cierto, falso, o no está seguro/a?)
- Cierto
  - Falso
  - No se /No estoy seguro/a
7. No hay ningún riesgo durante el procedimiento de la colonoscopia. (¿Es esto cierto, falso, o no está seguro/a?)
- Cierto
  - Falso
  - No se /No estoy seguro/a
8. Una persona debe hacerse una prueba de la materia fecal, o FOBT, cada 3 años. (¿Es esto cierto, falso, o no está seguro/a?)
- Cierto
  - Falso
  - No se /No estoy seguro/a
9. Solamente hay una prueba para la detección temprana de cáncer de colon. (¿Es esto cierto, falso, o no está seguro/a?)
- Cierto
  - Falso
  - No se /No estoy seguro/a
10. ¿En qué edad se recomienda que una persona debe comenzar a hacerse una prueba de detección de cáncer de colon?
- 35
  - 40
  - 45
  - 50
  - 55
  - No se/No estoy seguro/a

***Casi terminamos! Las siguientes preguntas son sobre lo que ha pudo haber discutido con su equipo medico hoy, y sobre lo que planea hacerse.***

11. ¿Tuvo usted una discusión sobre el ejercicio con su médico hoy?
- Sí
  - No
  - No sé/No estoy seguro/a
12. ¿Tuvo usted una discusión sobre la sanidad de los alimentos con su médico hoy?
- Sí
  - No
  - No sé/No estoy seguro/a

13. ¿Tuvo usted una discusión sobre las pruebas de detección de cáncer de colon (como la colonoscopia o la FOBT) con su médico hoy? SI CONTESTA NO, PASE A LA PREGUNTA 15
- Sí
  - No
  - No sé/No estoy seguro/a
14. ¿Cuál prueba de detección de cáncer de colon discutieron hoy?
- Solo la FOBT.
  - Solo la colonoscopia
  - La FOBT y la colonoscopia
  - No sé/No estoy seguro/a
15. Por favor, elija que tanto Usted está de acuerdo o en desacuerdo con esta declaración: “Tengo la intención de aprender más sobre la sanidad de los alimentos”.
- Muy en desacuerdo
  - En desacuerdo
  - No de acuerdo o en desacuerdo
  - De acuerdo
  - Muy de acuerdo
16. Por favor, elija que tanto Usted está de acuerdo o en desacuerdo con esta declaración: “Tengo la intención de hacer ejercicio por lo menos 30 minutos por día”.
- Muy en desacuerdo
  - En desacuerdo
  - No de acuerdo o en desacuerdo
  - De acuerdo
  - Muy de acuerdo
17. Por favor, elija que tanto Usted está de acuerdo o en desacuerdo con esta declaración: “Tengo la intención de hacerme una prueba de detección del cáncer de colon”
- Muy en desacuerdo
  - En desacuerdo
  - No de acuerdo o en desacuerdo
  - De acuerdo
  - Muy de acuerdo
18. ¿Si tuviera que elegir una prueba de detección de cáncer del colon, cual prueba prefería Usted?
- Prefería la FOBT
  - Prefería la colonoscopia
  - Todavía no he elegido una
  - No sé suficiente sobre eso para elegir
19. ¿Que tan seguro/a está Usted en su capacidad de hacerse una prueba de FOBT?
- No estoy seguro
  - Poco seguro
  - Algo seguro
  - Seguro
  - Muy seguro
  - No tengo suficiente información para saber



20. ¿Que tan seguro está Usted en su capacidad de hacerse una colonoscopia?

- No estoy seguro
- Poco seguro
- Algo seguro
- Seguro
- Muy seguro
- No tengo suficiente información para saber

***Solo quedan 3 preguntas más!***

**¿Alguno de los siguientes ha ocurrido HOY con su equipo medico?**

21. ¿he recibido tarjetas de la prueba de FOBT?

- Sí, ¿quien le dio? \_\_\_\_\_
- No
- No sé/No estoy seguro/a

22. ¿Su médico le dio una remisión para una colonoscopia?

- Sí
- No
- No sé/No estoy seguro/a

23. ¿Su médico le dio una remisión para otra prueba de detección de cáncer de colon?

- Sí
- No
- No sé/No estoy seguro/a

**Appendix Table.** Communication and Decision-Making Outcomes Among Latino Participants, Intervention Versus Control

|                                                  | Intervention<br>n=73 | Control<br>n=87 | Adjusted difference <sup>b</sup> |
|--------------------------------------------------|----------------------|-----------------|----------------------------------|
| Knowledge <sup>a</sup>                           |                      |                 |                                  |
| Baseline                                         | 2.7                  | 2.5             | --                               |
| Follow up                                        | 4.5                  | 2.8             | <b>1.6 (1.2, 1.9)**</b>          |
| Screening discussion                             |                      |                 |                                  |
| <i>FOBT only</i>                                 | 30%                  | 16%             |                                  |
| <i>Colonoscopy only</i>                          | 19%                  | 12%             |                                  |
| <i>Both tests</i>                                | 16%                  | 10%             |                                  |
| <i>"Not sure which test"</i>                     | 1%                   | 4%              |                                  |
| <i>None</i>                                      | 33%                  | 59%             |                                  |
| Any test                                         | 67%                  | 41%             | <b>25.8% (10.8%, 40.9%)**</b>    |
| Intent to be screened <sup>c</sup>               |                      |                 |                                  |
| Baseline                                         | 71%                  | 70%             | --                               |
| Follow up                                        | 94%                  | 85%             | <b>9.3% (0.5%, 18.2%***</b>      |
| Test preference                                  |                      |                 |                                  |
| <i>FOBT</i>                                      | 69%                  | 54%             |                                  |
| <i>Colonoscopy</i>                               | 25%                  | 17%             |                                  |
| <i>"Haven't decided which test"</i>              | 4%                   | 7%              |                                  |
| <i>"Don't have enough information to decide"</i> | 3%                   | 22%             |                                  |
| Any preference                                   | 93%                  | 71%             | <b>23.4% (12.3% 34.5%)**</b>     |
| Test ordering                                    |                      |                 |                                  |
| <i>FOBT only</i>                                 | 29%                  | 20%             |                                  |
| <i>Colonoscopy only</i>                          | 19%                  | 7%              |                                  |
| <i>Both tests</i>                                | 4%                   | 0%              |                                  |
| <i>None</i>                                      | 48%                  | 74%             |                                  |
| Any test                                         | 52%                  | 26%             | <b>27.8% (12.5%, 41.3%)**</b>    |

<sup>a</sup> Mean number of correct responses out of 6 items.

<sup>b</sup> Adjusted for study site and clustering by provider

<sup>c</sup> Higher intent to be screened (Strongly Agree/Agree) vs Lower (Strongly Disagree/Disagree/Neutral)

Note: Boldface indicates statistical significance (\*\* $p < 0.001$ ; \*\*\* $p < 0.05$ ).

FOBT, fecal occult blood testing
